# Supplementary figures and images for: Bet-hedging and epigenetic inheritance in bacterial cell development
Source: HighWire-hosted journal article supplement (doi:10.1073/pnas.0700463105), 2008-03-06

**Change in net fluo**

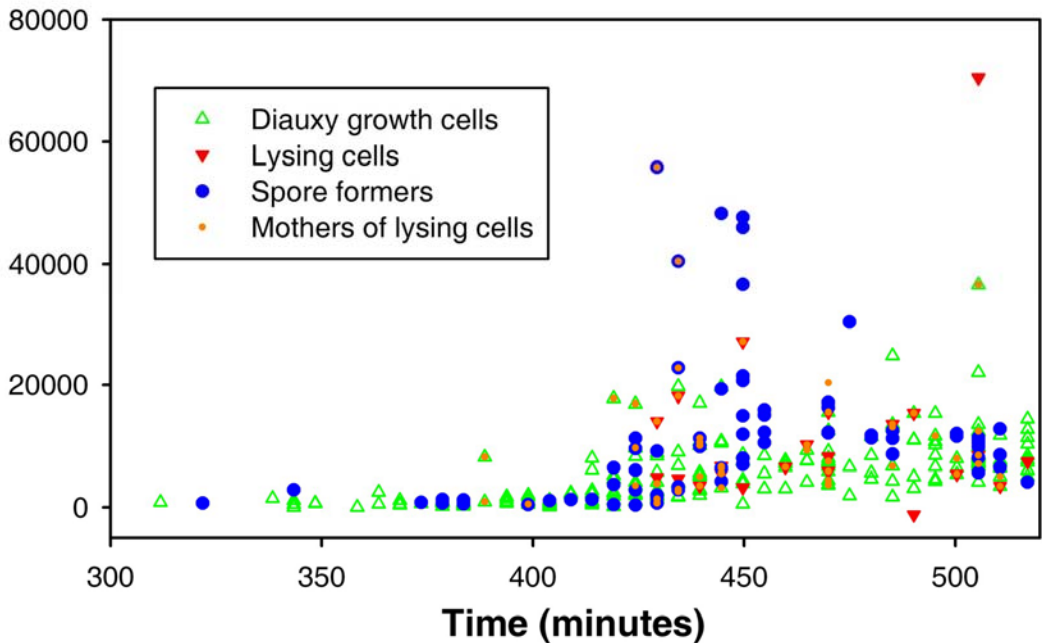

Supplement: 00463Fig11.pdf [file 00463Fig11.pdf]

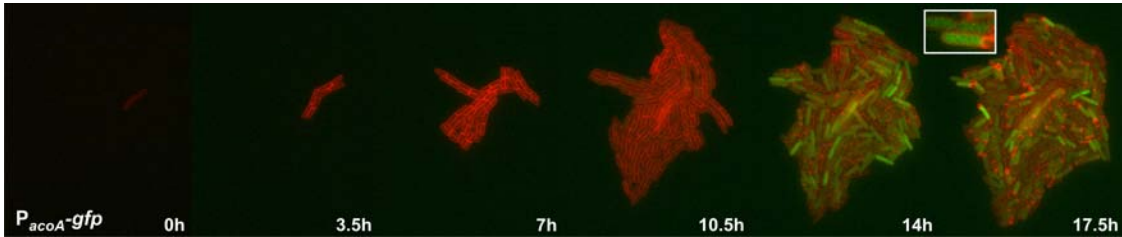

Supplement: 00463Fig18.pdf [file 00463Fig18.pdf]

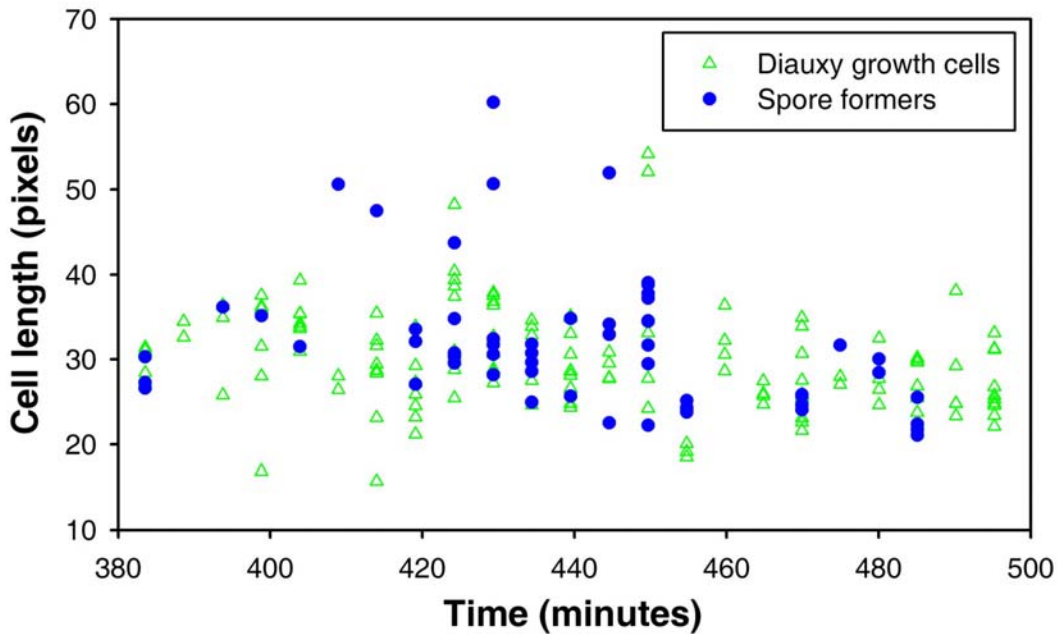

Supplement: 00463Fig9.pdf [file 00463Fig9.pdf]
